# Supplementary material
Source: MDPI journal article supplement (https://www.mdpi.com/2071-1050/13/13/7275)
Supplement: s1 [file s1]

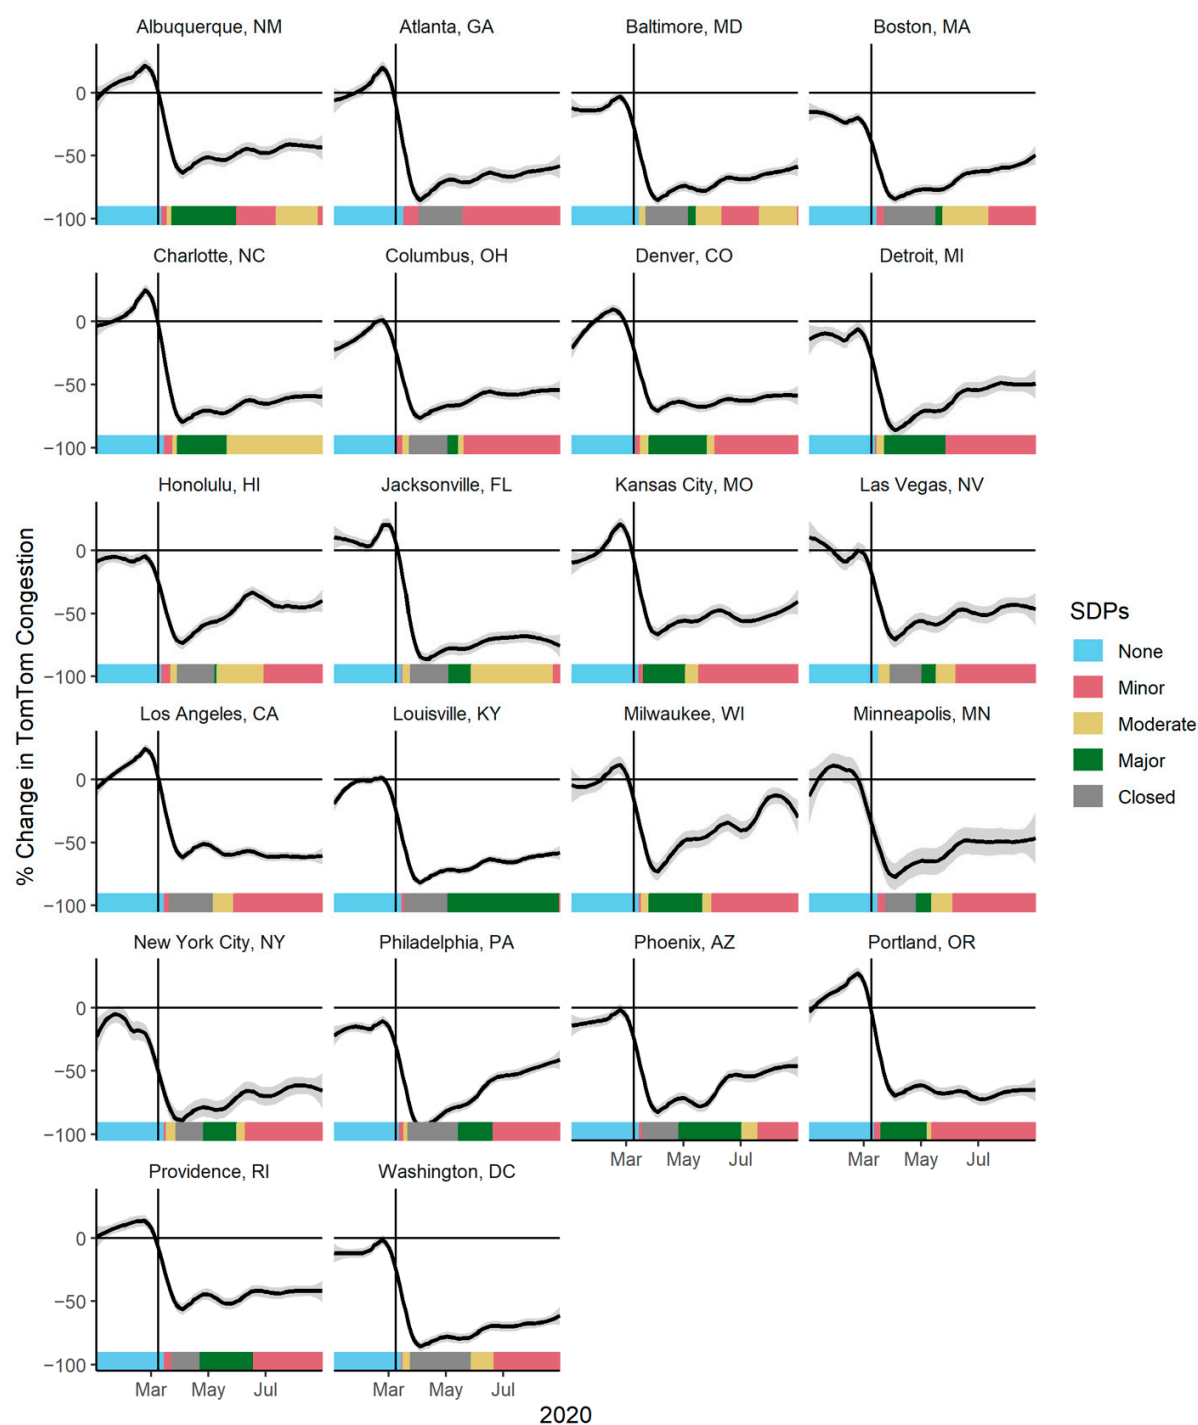

**Figure S2.** Percent change in daily traffic congestion by city over time in 2020 according to TomTom congestion data. A LOESS smoothing parameter of 0.3 was used. The percent change in congestion here is defined as the amount of congestion in 2020 relative to the average traffic congestion on the given weekday in 2019. The 95% confidence interval around the LOESS curve is in grey and the rug is color-coded based on city-specific SDPs over time. Vertical lines signify the start of the COVID-19 pandemic in the United States on March 9, 2020. See Figure 3 in the main paper for corresponding plots of seasonally adjusted NO<sub>2</sub>.
