# Supplementary material
Source: MDPI journal article supplement (https://www.mdpi.com/2071-1050/13/13/7275)
Supplement: s1 [file s1]

*Table S2. Alternative parameterization of congestion and mobility regressed on SDPs*

| Effect          | TomTom Congestion      |         | Unacast Mobility      |         |
|-----------------|------------------------|---------|-----------------------|---------|
|                 | Estimate (95% CI)      | p-value | Estimate (95% CI)     | p-value |
| Intercept       | -39.91 (-45.71,-34.1)  | <0.001  | -23.57 (-27.34,-19.8) | <0.001  |
| SDP: Moderate   | -2.98 (-5.51,-0.44)    | 0.022   | -2.53 (-4.2,-0.85)    | 0.004   |
| SDP: Major      | -2.69 (-5.99,0.6)      | 0.108   | -4.04 (-6.22,-1.86)   | <0.001  |
| SDP: Closed     | -5.51 (-8.99,-2.03)    | 0.002   | -7.83 (-10.14,-5.52)  | <0.001  |
| SDP: None       | 17.96 (14.56,21.36)    | <0.001  | 5.65 (3.39,7.9)       | <0.001  |
| SDP: Minor      | <i>Reference</i>       |         |                       |         |
| Heavy Snow      | 38.88 (29.46,48.3)     | <0.001  | -12.34 (-17.94,-6.73) | <0.001  |
| Light Snow      | -0.54 (-3.45,2.37)     | 0.715   | -2.2 (-3.96,-0.44)    | 0.014   |
| Sunday          | -4.14 (-5,-3.29)       | <0.001  | -2.68 (-3.18,-2.17)   | <0.001  |
| Monday          | -8.62 (-9.53,-7.72)    | <0.001  | -0.62 (-1.17,-0.07)   | 0.028   |
| Tuesday         | -11.96 (-12.89,-11.04) | <0.001  | 1.74 (1.17,2.31)      | <0.001  |
| Wednesday       | -11.46 (-12.39,-10.53) | <0.001  | 1.37 (0.8,1.94)       | <0.001  |
| Thursday        | -10.52 (-11.43,-9.62)  | <0.001  | 0.27 (-0.28,0.82)     | 0.336   |
| Friday          | -6.49 (-7.36,-5.63)    | <0.001  | -1.3 (-1.8,-0.79)     | <0.001  |
| Saturday        | <i>Reference</i>       |         |                       |         |
| Federal Holiday | -13.27 (-15.76,-10.79) | <0.001  | -1.52 (-3,-0.04)      | 0.044   |

- The above table reports findings from the linear mixed model regression analyses of the impact of SDPs on TomTom congestion and Unacast mobility with minor restrictions as the reference level.
- TomTom congestion estimates are interpreted in terms of the percent change in average daily traffic congestion compared to days with minor restrictions in place, where positive estimates indicate an increase in congestion and negative estimates indicate a reduction in congestion.

- Unacast mobility estimates are interpreted in terms of the percent change in the average daily distance traveled compared to days with minor restrictions in place, where positive estimates indicate an increase in mobility and negative estimates indicate a reduction in mobility.
