# Supplementary material
Source: MDPI journal article supplement (https://www.mdpi.com/2071-1050/13/13/7275)
Supplement: s1 [file s1]

*Table S3. Seasonally adjusted NO<sub>2</sub> and sociodemographics*

| Effect                         | Estimate                    | p-value |
|--------------------------------|-----------------------------|---------|
| Intercept                      | -1.4325<br>(-2.8832,0.0181) | 0.053   |
| Seasonally Adjusted Wind (m/s) | -0.479<br>(-0.5044,-0.4535) | <0.001  |
| Seasonally Adjusted Temp (°C)  | 0.2079<br>(0.1834,0.2324)   | <0.001  |
| Race: Black                    | 6e-04<br>(-0.0131,0.0143)   | 0.932   |
| Race: Asian                    | 0.017<br>(-0.0236,0.0576)   | 0.412   |
| Race: Two or More              | -0.0074<br>(-0.0873,0.0724) | 0.855   |
| Race: Other                    | 0.0074<br>(-0.0276,0.0424)  | 0.677   |
| Edu: Less Than High School     | 0.0133<br>(-0.0341,0.0607)  | 0.583   |
| Edu: High School               | -0.0406<br>(-0.0877,0.0063) | 0.09    |
| Edu: Some College              | 0.0444<br>(-0.0088,0.0976)  | 0.102   |
| Non-Citizen                    | -0.0299<br>(-0.0926,0.0328) | 0.35    |
| Population Density             | -0.1008<br>(-0.2295,0.0279) | 0.125   |

The above table presents findings from the linear mixed model regression analysis of seasonally adjusted NO<sub>2</sub> regressed on TomTom congestion, seasonally adjusted wind, seasonally adjusted temperature, education, race, citizenship, and population density. TomTom Congestion is reported as the average daily percent increase in the time that it took to drive with traffic congestion compared to “free flow” travel without traffic. Seasonally adjusted wind is the difference between the observed and forecasted wind speed in meters per second, and seasonally adjusted temperature is reported as the difference between the observed and forecasted temperature in degrees Celsius. The population density is in terms of thousands of people per square kilometer. Estimates are interpreted in terms of parts per billion changes in NO<sub>2</sub> relative to forecasted.
